# Supplementary figures and images for: Efficacy of Removing Bacteria and Organic Dirt from Hands—A Study Based on Bioluminescence Measurements for Evaluation of Hand Hygiene When Cooking
Source: MDPI journal article supplement (doi:10.3390/ijerph18168828), 2021-08-21

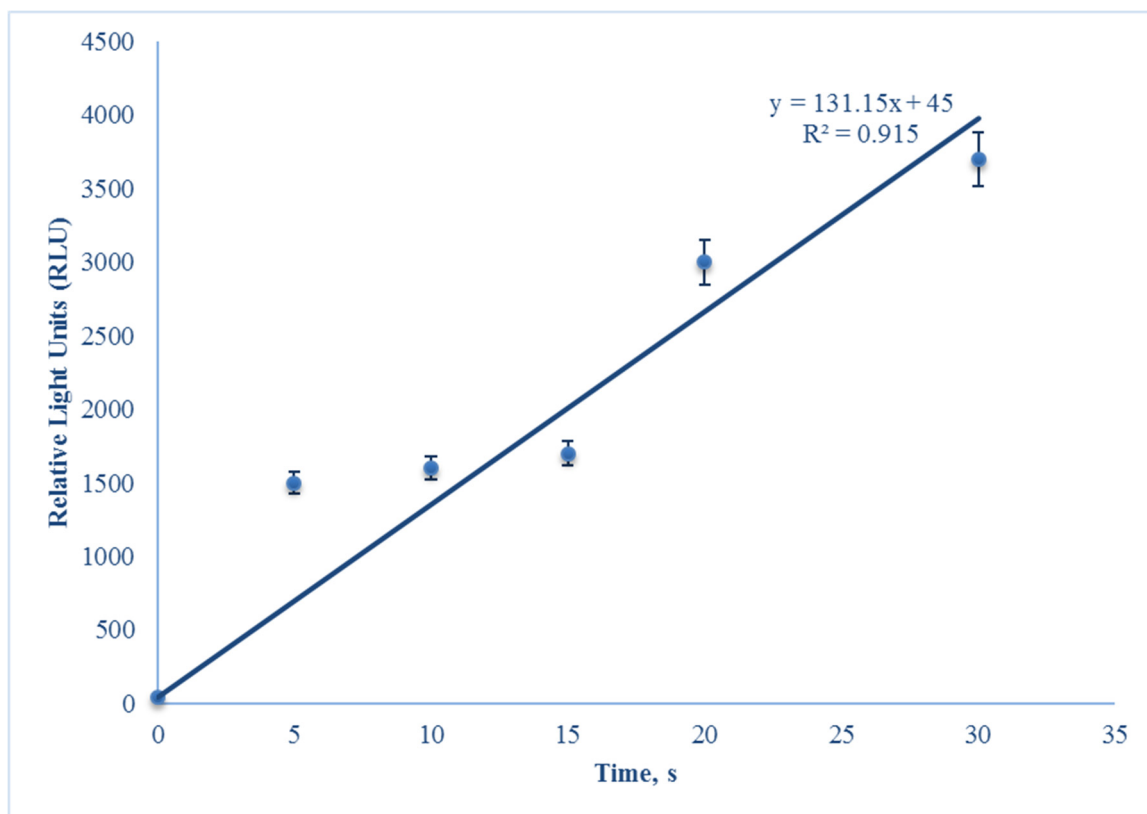

**Figure S1.** Calibration curve for simulated dirtiness.

Supplement: s1 [file s1]
